# Supplementary material for: Vagus Nerve Stimulation Improves Cardiac Function by Preventing Mitochondrial Dysfunction in Obese-Insulin Resistant Rats
Source: PubMed Central journal article supplement (PMC4735283; doi:10.1038/srep19749), 2016-02-01
Supplement: srep19749-s1.pdf [file srep19749-s1.pdf]

## **Supplementary Information file**

**Title:** Vagus Nerve Stimulation Improves Cardiac Function by Preventing Mitochondrial Dysfunction in Obese-Insulin Resistant Rats

**Authors:** Bencharunan Samniang, Krekwit Shinlapawittayatorn, Titikorn Chunchai, Wanpitak Pongkan, Sirinart Kumfu, Siriporn C. Chattipakorn, Bruce H. KenKnight PhD, Nipon Chattipakorn\*

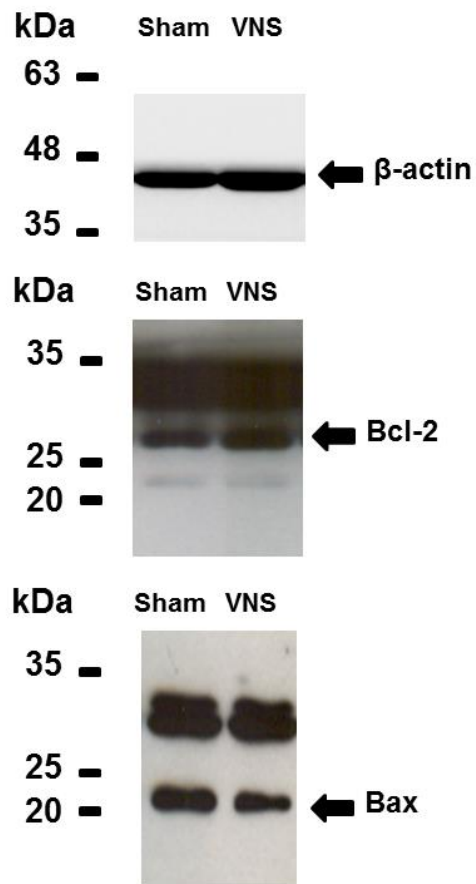

**Supplementary Figure S1. Full length blots of data shown in Fig. 4D**

The gels were initially cut ranged from 17 kDa to 63 kDa. VNS vagus nerve stimulation.
